# Supplementary material
Source: Springer Nature journal article supplement (https://www.springermedizin.de/resource/supplementary/12885_2013_4456_MOESM15_ESM.pdf/9466468)

**A****Ch25h-11.5-pRL**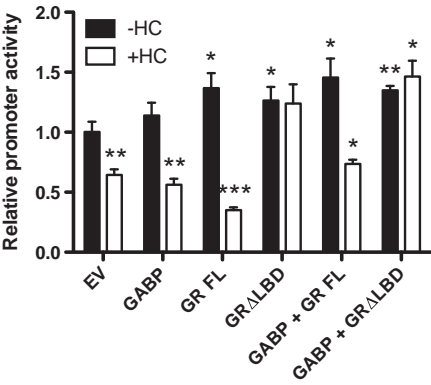**B****Ch25h-12-pRL**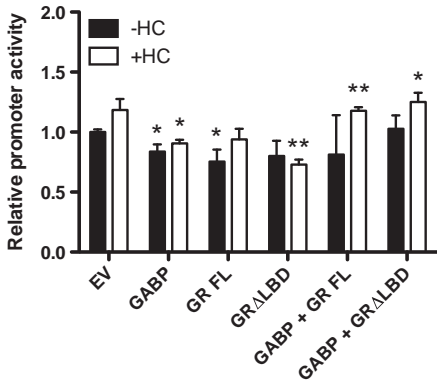

Supplement: MOESM15 [file 9466468]
